# Supplementary material
Source: PubMed Central journal article supplement (PMC2574655)

## Supplementary Materials

**sTable 1.** The cell densities of nine abundant odorant receptors in the septal organ are summarized at different time points.

| OR Gene   | P0                   |              | 4 wks                  |              | 12 wks                 |              |
|-----------|----------------------|--------------|------------------------|--------------|------------------------|--------------|
|           | Density              | Contribution | Density                | Contribution | Density                | Contribution |
| MOR256-3  | 507 ± 55<br>(n = 12) | 28.6%        | 3550 ± 230<br>(n = 14) | 49.9%        | 3832 ± 258<br>(n = 14) | 50.7%        |
| MOR244-3  | 134 ± 29<br>(n = 13) | 7.5%         | 983 ± 82<br>(n = 20)   | 13.8%        | 1044 ± 66<br>(n = 20)  | 13.8%        |
| MOR235-1  | 105 ± 20<br>(n = 17) | 5.9%         | 447 ± 60<br>(n = 24)   | 6.3%         | 500 ± 54<br>(n = 20)   | 6.6%         |
| MOR0-2    | 137 ± 34<br>(n = 13) | 7.7%         | 440 ± 57<br>(n = 22)   | 6.2%         | 454 ± 52<br>(n = 20)   | 6.0%         |
| MOR236-1  | 250 ± 38<br>(n = 15) | 14.1%        | 424 ± 55<br>(n = 24)   | 5.0%         | 442 ± 49<br>(n = 20)   | 5.8%         |
| MOR256-17 | 278 ± 31<br>(n = 13) | 15.7%        | 344 ± 82<br>(n = 10)   | 4.8%         | 332 ± 56<br>(n = 20)   | 4.4%         |
| MOR122-1  | 78 ± 24<br>(n = 9)   | 4.4%         | 319 ± 45<br>(n = 18)   | 4.5%         | 331 ± 37<br>(n = 18)   | 4.4%         |
| MOR160-5  | 198 ± 30<br>(n = 12) | 11.2%        | 310 ± 48<br>(n = 28)   | 4.4%         | 327 ± 40<br>(n = 20)   | 4.3%         |
| MOR267-16 | 88 ± 28<br>(n = 7)   | 5.0%         | 292 ± 44<br>(n = 19)   | 4.1%         | 297 ± 33<br>(n = 20)   | 3.9%         |

The averaged cell density per cross-sectional area of the septal organ is denoted as cell number ± standard error/mm<sup>2</sup>, with *n* = the number of septal organ sections (thickness = 20 μm). The relative contribution (%) for each OR is obtained by normalizing the averaged cell density to the sum of the cell densities from all nine ORs. The cell densities at 12 weeks are not significantly different than those at 4 weeks. Detailed temporal onsets and growth rates for different receptor cells are reported elsewhere (Tian and Ma, 2008).

**sTable 2.** The primer and probe sequences of the nine odorant receptors are listed below.

1. MOR256-3 (accession number: AY073026, coding region = 948 bp)

Forward primer: CCATTATCCTAGTTTCCCGCC

Reverse primer: GTACCCAGGATGAGGCTGAGA

Probe sequence (520 bp):

CCATTATCCTAGTTTCCCGCCTAGACCCCCAGCTTGACAGCCCCATGTACTTTTTTGTCTCCAACCTTTCTCTT  
CTGGACCTCTGCTATACTACGAGCACTGTCCCTCAGATGTTGGTCAACCTTAGAGGGCCTGAAAAGACCATC  
AGCTATGGTGGCTGTGTGGCCAGCTCTATATTTCTTGGCTTTGGGCTCAACTGAATGTATCCTTCTGGCCA  
TCATGGCCTTTGACCGTTTTGCTGCCATTTGCAGGCCCTTCACTATCCTATCATCGTGAACCAGAAACGATG  
CATTATATGGCCACAGGAACCTGGATTAGCGGATTTGCAAACCTCTTGTGCAGTCCACCCTCACTGTGGT  
AGCCCCAGGTGTGGACAGAGGGTAATAGACCATTTCTTCTGTGAAGTCCCAGCCCTTTTGAACCTAGCTTG  
CACTGACACAAGTGTGAATGAAGCTGAGCTTAATGTTCTTGGAGCTTTGCTGCTCTTGGTGCCTCTCAGCCTC  
ATCCTGGGTAC

2. MOR244-3 (accession number: AY073295, coding region = 927 bp)

Forward primer: GGGAAGTTCCTCATTGTTGTT  
Reverse primer: AGGCTAGAAAACATACGAGGG  
Probe sequence (519 bp):

GGGAAGTTCCTCATTGTTGTTACCATAGTCTTCACGCCACGTCTCCACAATCCCATGTACTTCTTTCTGAGCA  
ATCTGTCCTTCATTGACATCTGCCACTCATCTGTCACCGTGCCCAAGATGCTTGAGGGTTTGCTTTTAGAGAG  
GAAGACCATTTCCTTTGACAATTGCATTGCACAGCTCTTCTTCTACATCTCTTTGCTTGTCTGAGATCTTTC  
TGCTGACGATTATGGCGTATGATCGTTATGTGGCTATCTGCATCCCATTGCATTACTCCAATGTGATGAACAT  
GAAGGTCTGTGTACAGCTTGTCTTTGCACTCTGGCTGGGGGGCACTATTCACTTGTGCAGACCTTCTT  
GACTATTCTGCTACCTACTGTGGCCCAAACATTATCGATAGCTACTTCTGTGACGTACCTCCTGTCATCAAG  
CTGGCCTGCACAGATACATACCTTACAGGGATTCTGATCGTGTCCAATAGTGAACCATCTCCCTCGTATGTT  
TTCTAGCC

3. MOR0-2 (accession number: AY635588, coding region = 1055 bp)

Forward primer: TTCCTTTGCCAGTTGTCAGC

Reverse primer: TCCGTGTACAGGCCAAGTG

Probe sequence (403 bp):

TTCCTTTGCCAGTTGTCAGCCATTGAACTCTGCTACACGCTAGTGGTGGTGCCCCGTTCTCTAGCTGACCTG  
AGCATGCCTGGCCATGGCAGGGGCAGTCCCATCTCATTCTTGGGCTGTGCTGTCCAAATGCAGATGTTTGTG  
GCACTGGGTGGGGCTGAGTGCTTTTTGCTGGCAGCCATGGCCTATGACCGCTACGTGGCCATCTGCCACCC  
CCTGCGATATGCATCTATAGTGACCCAGGTCTATGTGCACGCCTGGCCCTGGCCTGCTGCCTTGGAGGAC  
TAGCTGTATCCGTGGGGCTAACGGTGGCAGTGTCCACCTGCCTTTCTGTGGCTCCCGCCTGCTGGTGCATT  
TCTTCTGCGACATCACCGCACTGCTGCACTTGGCCTGTACACGGA

4. MOR235-1 (accession number: AY073623, coding region = 909 bp)

Degenerate forward primer: ATGGCIT(T/A)(T/C)GA(T/C)(C/A)GIT(T/A)(T/C) (T/C/G)TIGC

Degenerate reverse primer: ATIA(A/T/G)IGG(G/A)TTIA(A/G)CAT

Probe sequence (485 bp):

GTGGCCATCTGCAAGCCCCTACACTATAACCACCACCATGACCAGGCATGTCTGTATTGTGCTGGTGGCAGTG  
GCTTGGCTGGGTGGCATCCTGCATTCAACAGCTCAGCTCTTTCTGGTCCCTTCAGTTGCCCTTCTGTGGTCCC  
AATGTGATAAACCCTTTGTGTGTGACTTGTATCCTTTACTGGAGCTGGCCTGCACTGACACATATGTCATTG  
GCCTGCTGGTGGTGGCCAACAGTGGTGTGATTTGCCTGTTGAACTTCCTCATGCTGGCTGCCTCGTACATTG  
TCATCCTGCGCACTTTGAGGTCCCACAGTGCAGAGGGAAGACGGAAAGCTCTGTCTACCTGTGGAGCCCAC  
TTCACTGTTGTTGCTTTGTTCTTTGTGCCCTGTATATTTATTTACATGAGACCATCATCTACTCTGTCCATAGAC  
AAAATAGTAGCTGTGTTTTATTGTATTTTGTACACCCATGCTCAACCCCCT

5. MOR122-1 (accession number: AY073588, coding region = 933 bp)

Same degenerate primers for MOR235-1

Probe sequence (512 bp):

TATGATCGGTACCTGGCCATTTGCCACCCCCTTACCTACCCGGTCCCTCATGAGCACCTGGTGTGTGCCG  
CTAGCCACGGGGGCTGTTTTCAGTGGCTTCTTCTTCTGCTTCACTCTGGCCTTGGCAGCCCCTCTGTCC  
CTCTGTCCCGCCGCGAGGGTGATTGATCACTACTTCTGTGACTTCGCTCCGGTGGTAGGGCTGTTCTGTGGA  
GAGGTGTGGGTCATGTGGGGGCTGGCGTGAGCATCTCGGGCTGCCTCACACTCGCCCCCTTCTGTTGAT  
CGTCGCGTCCCTACGTCTTTCATCCTGCGGGCTGTGCTGAGAATCCCTTCCAGCCACGGGAGGCAGAAAGCCT  
TCTCCACCTGCTCCTCCACCTCAGTGTGGTTCGCGGTATTCTACGGCACTCTCATCGTGGTCTATGTGGCCC  
CGACAGAGCACATGCCCGCCTTGCTCCGGAAGGCCTTCTCTGTCTTCTACACAGTGCTTACCCCATGCTCA  
ATCCCCTCAT

6. MOR236-1 (accession number: AY073890, coding region = 930 bp)

Same degenerate primers for MOR235-1

Probe sequence (484 bp):

TGACCGGTACGTGGCCACTCTGCAAACCCCTGCACTATAACCACCACCATGACCAGGCACCTTTGTGTCGTGCT  
GGTGGCGGTGGCTTGGCTGGGTGGTTTCTGCACTCGTTGGTTCAGATCCTTCTGATTTTTTTCAGTTGCCTTTC  
TGTGGACCCAATGTAATAAACCCTTTGTGTGTGACTTGTATCCTTTACTGGAGCTGGCCTGCACCAACACAT  
ACGTCATCGGCCTGCTGGTGGTGGCCAACAGTGGTGTGATTTGCCTGCTGAACTTCTCATGTTGGCTGCCT  
CGTACATTGTCATCTTGCCTCTTTGCGGTCCCACAGTGCAGAGGGGAGACGGAAAGCTCTGTCTACCTGTG

GGGCTCACTTCACTGTGGTACTATGTTCTTTGTGCCCTGTATATTTAGTTATATGCGTCCATCGACTACTTTA  
CCTATAGATAAAAACATGGCAGTGTCTTATGGTATTCTCACACCCATG

7. MOR160-5 (accession number: AY073813, coding region = 936 bp)

Forward primer: AACCTGACGATGCTGCTGGT

Reverse primer: GATTGGGAGAAAGGTCCCC

Probe sequence (522 bp):

GGGAACCTGACGATGCTGCTGGTGTATCACGGCTGACTCCCACCTCCACACGCCCATGTACTTCTTCCTAAGT  
AACCTGTCTTCCTGGATCTCTGCTTCTCATCCGTACGGTACCGAAGCTGCTGAAGGACCTGCTGTCTGCT  
AAGAAAACCATCTCTGTAGAGGGCTGCCTGGCTCAGGTCTTCTTCGTGTTTCATCACTGCGGGAACCGAAGCC  
TTTCTTCTGTCAATGATGGCGTACGACCGCTACGCGGCTGTCTGCCACCCGCTACTCTATGGGCAGATGATG  
AGCAACGAACCTCTGTCTGAAGTTGGTTTTGCTCTCATGGGGCCTGGCCTCTCTCAGTTCAGTAGTCATTGTG  
CTCTTGGCGGTGAACCTGGACTTCTGCGAGGCCTACACCATAACCCTACACGTGTGAGTTACCCTCTCTC  
TTTCTTTGTCTTGCTCAGATATCTCCATCAACGTGGACATCTTGATCTGCTCTACCCTGCTGCACGGGCTGG  
GGACCTTTCTCCCAATC

8. MOR256-17 (accession number: AY073576, coding region = 939 bp)

Forward primer: ATGGAGGTGGACAGCAACA

Reverse primer: TTCCTTTCCCAGCAATCTT

Probe sequence (907 bp):

ATGGAGGTGGACAGCAACAGCTCCTCTGGGAGCTTCATTTCGATGGGTGTCTCTGACCATCCCCATCTGGAG  
ATCATCTTTTTTGTGTCTCCTGGCCTCTTACTTGTGACGCTGGTTGGGAACCTTGACCATCATCCTCTTTTCG  
GCCTTGATGCTCGGCTCCACACACCCATGTACTTCTTCTCACAACCTCTCCTCTCTAGACCTTGCCTTTACT  
ACCAGTTCAGTCCCTCAGTGTGAAAAATTTATGGGGGCCAGACAAGACAATCAGCTATGGTGGGTGGTAAC  
TCAACTCTATGTTTTCTTTGGCTGGGGGCTACTGAGTGCATACGCTCGTGGTGTATGGCATTGATCGGTAT  
GTGGCAGTTTGTGCGCCCTGACTACATGACCGTCATGAATCCTCGCCTCTGCTGGGGGCTGGCTGCTATA  
GCTGGTTGGGTGGCTTAGGCAACTCCGTGATTCAGTCAACATTCCTCCAGCTCCCATTTTTGCGGACACCG  
AAAAGTGGACAACCTTCTGTGTGAGTACCCGCCATGATTAATTTGGCCTGTGGAGACACAAGTCTCAATGAG  
GCGTGTCAATGGTGTGTGACCTTCTTCACTGTGGTCCCAGTAAGCGTCACCTGGTCTCTTACTGCTTCATT  
GCTCAGGCAGTGATGAAGATCCGCTCTTGGAGGGACGTCGAAAGGCTTCAATACGTGTGTCTCCCACTTGG  
TGGTGTGTTTTCTTCTATGGCTCTGCGATCTATGGGTATCTGCTTCCAGCTAGAGCAGTAATCAAAGCCAAG  
GAAAATTCATTTCTCTTCTACTCTGTGTCACACCCATGGTGAATCCGCTCATCTATACTCTAAGAAACAAAG  
AAGTAAGGGGGCCCTGGGAAGATTGCTGGGGAAAGGAA

9. MOR267-16 (accession number: AY073823, coding region = 945 bp)

Forward primer: TCTTCCTTTCTGTCCTGTCCT

Reverse primer: TGGAAAACGCTTTGTACCTG

Probe sequence (537 bp):

TCTTCCTTTCTGTCCTGTCCTGTTCTGAGACCTGCTACACCTTCGTCATTGTGCCCAAGATGCTGGTTGACTT  
GCTGGCGCGGAAGAAGAGCATCTTTTCTCGGCTGCGCCATCAAATGTTACCTTCTTCTCCTCGGCTG  
TTCTCATTCTTCTGCTGGCAGCCATGGGTTATGATCGATACGTGGCCATTTGCCACCCTCTGCGCTACAC  
GGTGCTCATGGGGCACAGGGTATGCGTGGGGCTAGTAGCTGCTGCGTGTGTCTGTGGCTTCACTGTGGCAC  
AGGTAATCACATCCCAGGTGTTTCGTCTACCCTTCCGCTCTTCCAATCAACTCCACCCTTTTTCTGTGACAT  
CTCCCCTGTTCTCCAGTTGGCATCTCACCACCCTCACTCCACTCAGATCACCATCTTCTGCTTTGCGCGCTG  
GTCTTGGTTATCCCTCTTGTGATCCTGGTATCATATTCACATCATTTCTGCCATCCTCCAATTCCCTTC  
CACGCTGGGCAGGTACAAAGCGTTTTCCA

sFigure 1. The septal organ neurons predominantly express nine odorant receptors. Coronal sections from four week old animals were hybridized by a mixture of nine DIG-labeled OR probes (red) (A) and a FLU- labeled OMP probe (green) (B). The combined image of A and B is shown in (C). Mix9 included antisense RNA probes of the following receptors: MOR256-3, MOR244-3, MOR235-1, MOR0-2, MOR236-1, MOR256-17, MOR122-1, MOR160-5, and MOR267-16. The confocal images are shown at a single optical plane with a thickness of 1  $\mu\text{m}$ .

sFigure 2. Coexpression of multiple odorant receptor genes in single neurons are confirmed in a stack of confocal images. Ten images taken at consecutive planes ( $z$  step = 0.5  $\mu\text{m}$ , numbered from 1 to 10) from the example in Fig. 1B are shown. Arrowheads in plane 6 mark a single neuron coexpressing MOR256-3 and at least another odorant receptor in Mix8.

sFigure 3. More examples of colocalization under different conditions are shown in confocal images at a single optical plane with a thickness of 1  $\mu\text{m}$ . Each row represents the staining from the same tissue section. Arrow heads mark colocalization. Mix3 contained MOR244-3, MOR236-1, and MOR0-2 probes. Mix5 contained MOR235-1, MOR160-5, MOR122-1, MOR256-17, and MOR267-16 probes.

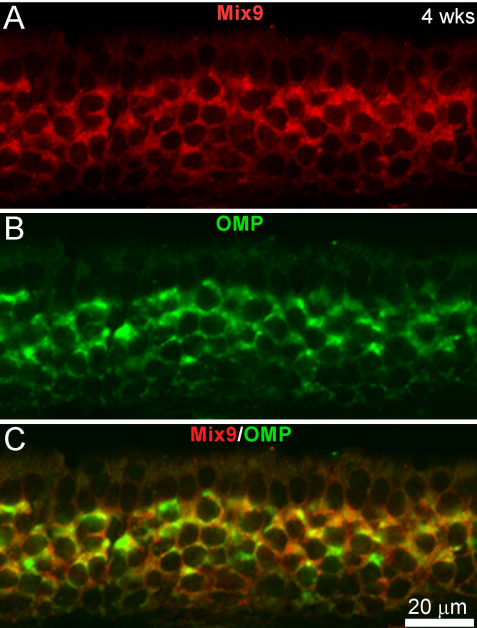

Supplementary sFig. 1

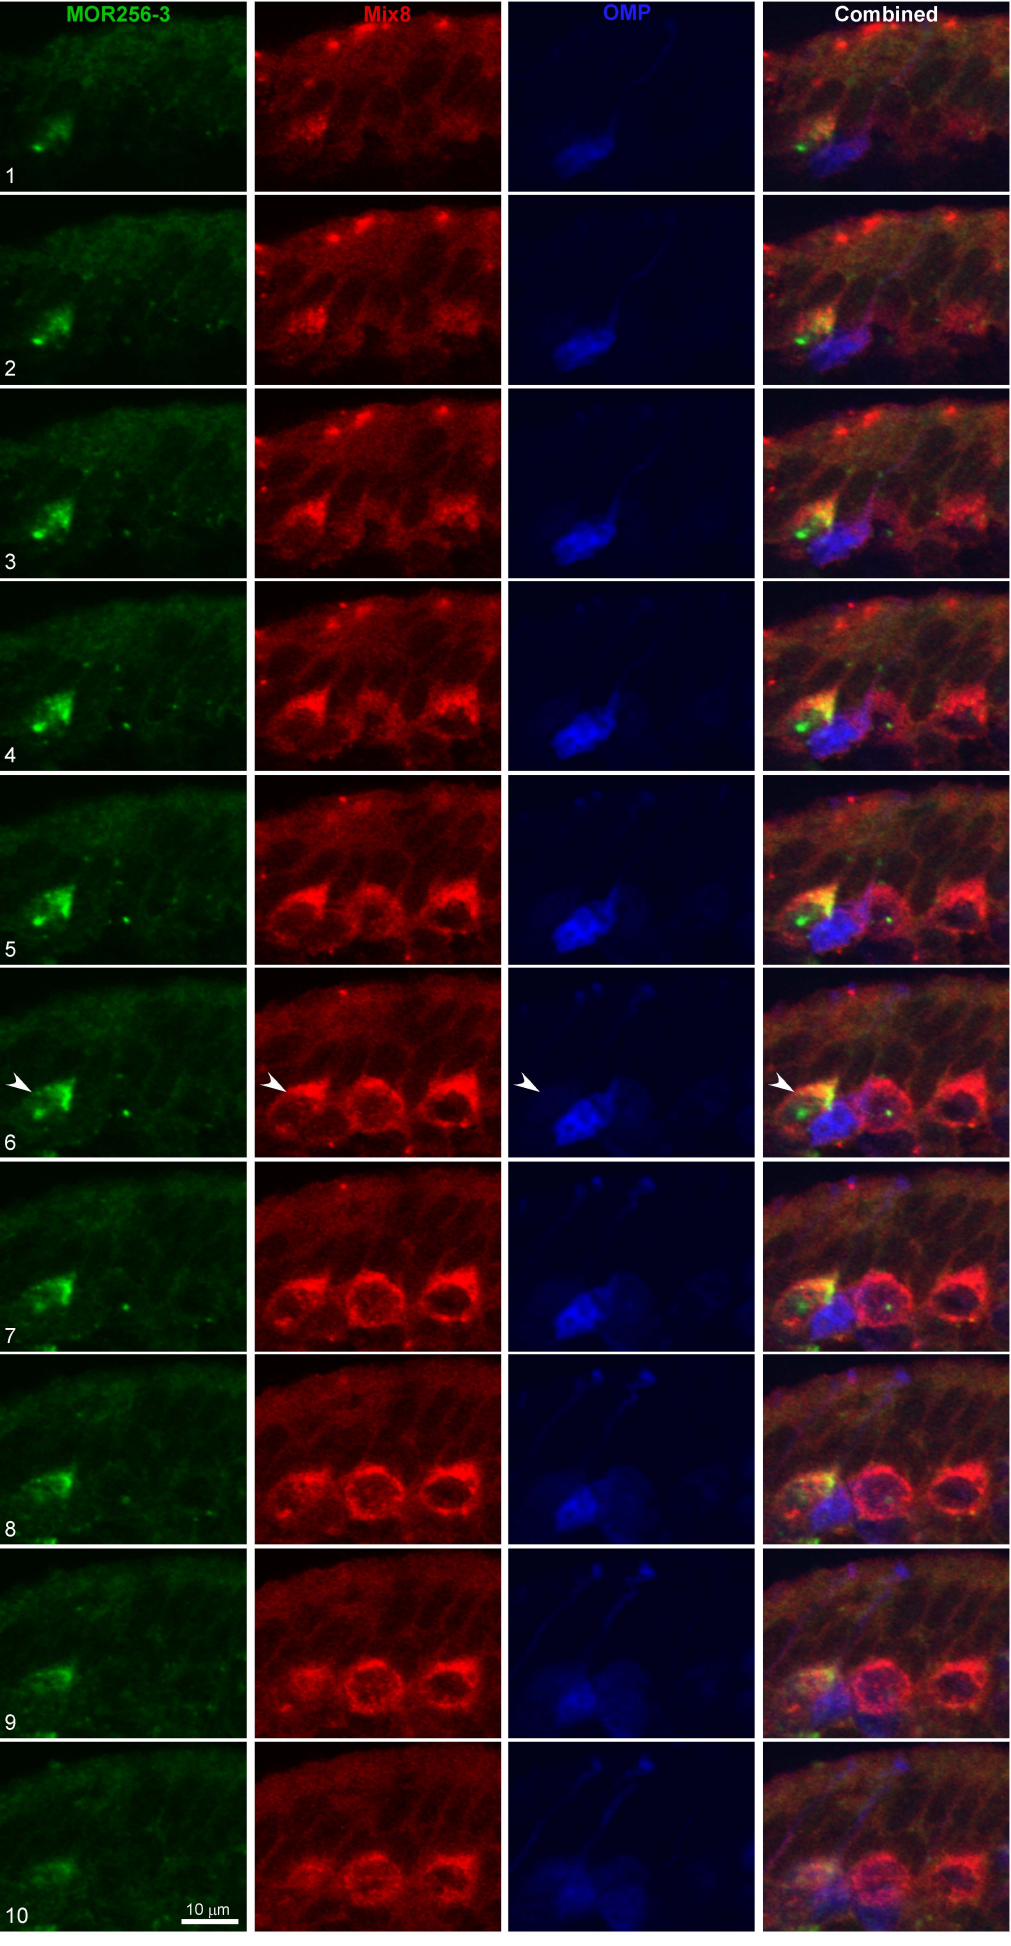

Supplementary sFig. 2

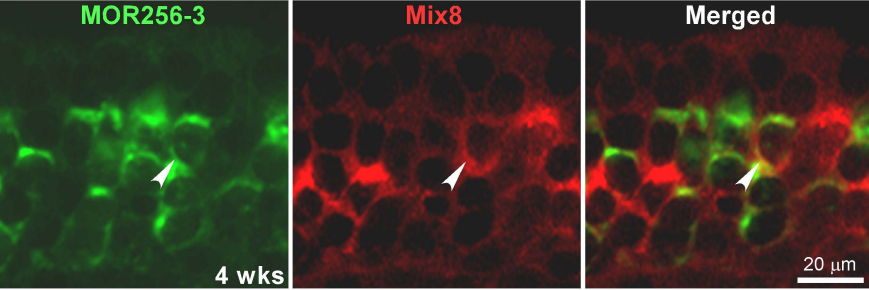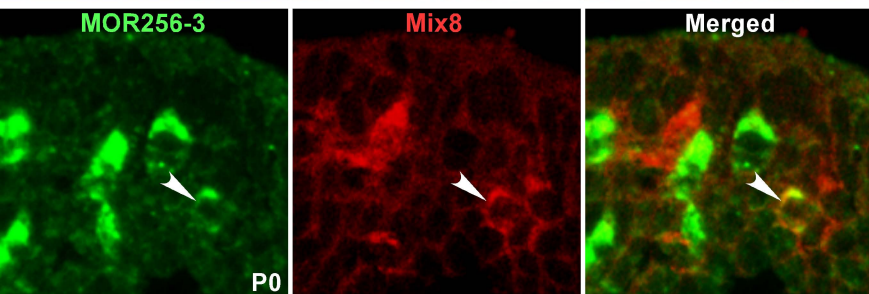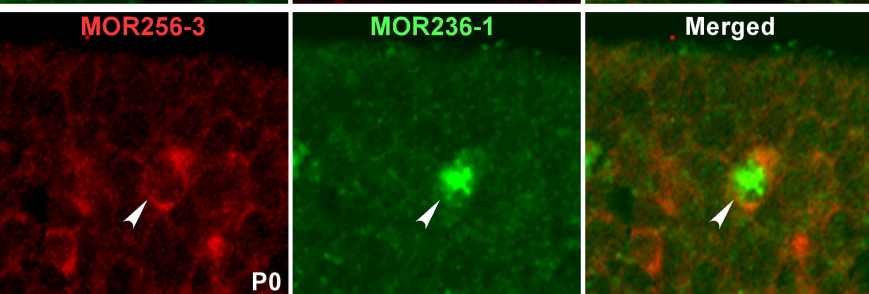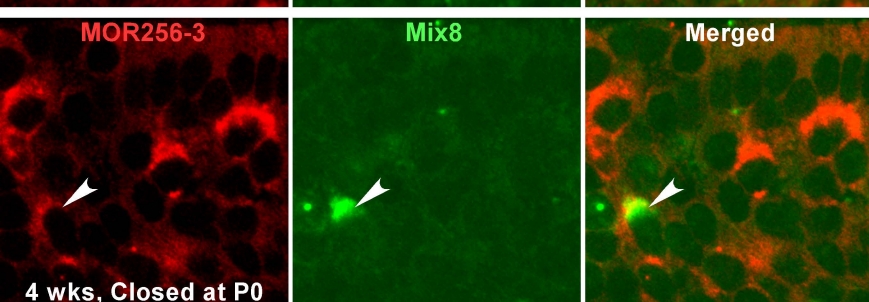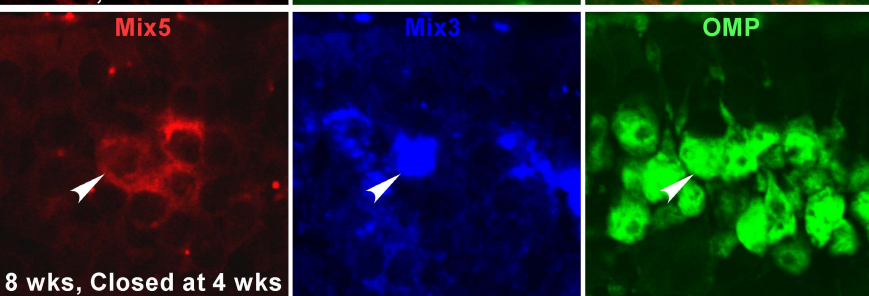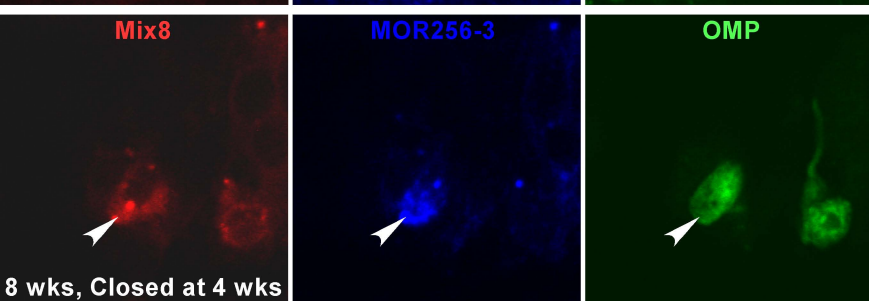

Supplement: NIHMS58941-supplement-2.pdf [file NIHMS58941-supplement-2.pdf]
